# Supplementary material for: Differential IRF8 Transcription Factor Requirement Defines Two Pathways of Dendritic Cell Development in Humans
Source: Immunity. 2020 Aug 18;53(2):353–370.e8. doi: 10.1016/j.immuni.2020.07.003 (PMC7447982; doi:10.1016/j.immuni.2020.07.003)
Supplement: Document S1. Tables S1–S4 and Figures S1–S7 [file mmc1.pdf]

## **Supplemental Information**

### **Differential IRF8 Transcription Factor**

### **Requirement Defines Two Pathways**

### **of Dendritic Cell Development in Humans**

**Urszula Cytlak, Anastasia Resteu, Sarah Pagan, Kile Green, Paul Milne, Sheetal Maisuria, David McDonald, Gillian Hulme, Andrew Filby, Benjamin Carpenter, Rachel Queen, Sophie Hambleton, Rosie Hague, Hana Lango Allen, James E.D. Thaventhiran, Gina Doody, Matthew Collin, and Venetia Bigley**

**Table S1. DC2 and DC3 marker genes identified by Villani et al., (related to Figure S1)**

Transcripts identified as DC2 and DC3 marker genes by Single Cell RNA-Seq in Villani et al., and present in our BM Single Cell RNA-Seq dataset, used to cluster BM DCs in Figure S1J,K

| DC2 Genes | DC3 Genes |         |
|-----------|-----------|---------|
| SLC2A3    | MGST1     | IL1RN   |
| FCGR2B    | MTMR11    | ASGR1   |
| PTGS1     | VCAN      | NLRP12  |
| CD33      | SLC2A3    | ADAM15  |
| AREG      | RAB27A    | S100A8  |
| CLEC4A    | FCN1      | MPP7    |
| CCR6      | LAT2      | HNMT    |
| CD2       | LYZ       | NR4A2   |
| MBOAT7    | RETN      | PID1    |
| CLEC10A   | IL27RA    | CD1D    |
| ENTPD1    | RAB3D     | LMNA    |
| ADAM8     | BST1      | ITGA5   |
| NR4A2     | HBEGF     | NLRP3   |
| PID1      | CSF3R     | S100A9  |
| CLIC2     | PLBD1     | S100A12 |
| CACNA2D3  | CSTA      | MNDA    |
| ETS2      | NFE2      | NOD2    |
| CD1D      | F13A1     | RNASE2  |
| CD1C      | TREM1     | PTAFR   |
| CD1E      | EREG      | CD14    |
| ITGA5     | IL1B      | FPR1    |
| PEA15     | IL13RA1   | CD163   |
| NOD2      | CLEC10A   | FCER1A  |
| PTAFR     | MICAL2    | TMEM173 |
| PER1      | ANXA1     | CES1    |
| FCER1A    | CD36      | NAIP    |
| CLEC17A   | AOAH      |         |

**Table S2. CyTOF Panel (Related to Figures 1 and 5)**

Antigens included in the CyTOF panel and the antibody metal conjugate. For antibody details see **Key Resources Table**

| Antigen                        | Metal             | Surface/intracellular |
|--------------------------------|-------------------|-----------------------|
| CD14                           | 113In             | S                     |
| CD370/CLECL9A                  | 141Pr             | S                     |
| AXL                            | 142Md             | S                     |
| CD123                          | 143Nd             | S                     |
| CD11b                          | 144Nd             | S                     |
| CD116                          | 145Nd             | S                     |
| SIGLEC6                        | 146Nd             | S                     |
| CD303                          | 147Sm             | S                     |
| SIRPA                          | 148Nd             | S                     |
| IRF8                           | 149Sm             | IC                    |
| FCER1                          | 150Nd             | S                     |
| CD2                            | 141Eu             | S                     |
| IRF4                           | 152Sm             | IC                    |
| CD45RA                         | 153Eu             | S                     |
| CD38                           | 154Sm             | S                     |
| CD36                           | 155Gd             | S                     |
| CD10                           | 156Gd             | S                     |
| Lineage-FITC (CD3, 19, 20, 56) | 157Gd (secondary) | S                     |
| CD33                           | 158Gd             | S                     |
| CD11c                          | 159Tb             | S                     |
| ID2                            | 160Gd             | S                     |
| CD90                           | 161Dy             | S                     |
| SLAN-PE                        | 162Dy (secondary) | S                     |
| BTLA                           | 163Dy             | S                     |
| CD15                           | 164Dy             | S                     |
| CD141                          | 165Ho             | S                     |
| CD34                           | 166Er             | S                     |
| CD115                          | 167Er             | S                     |
| CD100                          | 168Er             | S                     |
| CD304                          | 169Tm             | S                     |
| CD135                          | 170Er             | S                     |
| CD88                           | 171Yb             | S                     |
| CD117                          | 172Yb             | S                     |
| HLA=DR                         | 173Yb             | S                     |
| CD1c                           | 174Yb             | S                     |
| CD5                            | 175Lu             | S                     |
| CX3CR1-APC                     | 176Yb             | S                     |
| CD16                           | 209Bi             | S                     |
| CD45 (PBMC)                    | 115In             | S                     |
| CD45 (BM)                      | 89Y               | S                     |
| Cisplatin                      | 195Pt             |                       |
| DNA                            | 191Ir             |                       |

**Table S3. Single Cell analysis parameters (related to Figures 1, 3, 4, S3, S4)**

| Dataset                                     |                                                                   | BM CD34+ Progenitors        | BM CD34med pre-DC and DC                     | PB pre-DC           |
|---------------------------------------------|-------------------------------------------------------------------|-----------------------------|----------------------------------------------|---------------------|
| Figures                                     |                                                                   | Figures 3E-J; S3D-H         | 1H, S1J-L, S4E-K, S4H-J                      | S4K-Q               |
| <b>Raw Data Analysis and QC CELLS</b>       | Total cells sequenced                                             | 399                         | 260                                          | 184                 |
|                                             | ERCC % threshold (adjusted for concentration of ERCC spike added) | 30%                         | 70%                                          | 25%                 |
|                                             | Mitochondrial % threshold                                         | 25%                         | 15%                                          | 30%                 |
|                                             | Total features threshold                                          | >2500                       | >1700                                        | >3000, <5000        |
|                                             | Total counts threshold                                            | >50000                      | >50000                                       | >25000              |
|                                             | Number of cells retained after cell filtering                     | 262                         | 244                                          | 116                 |
| <b>Raw Data Analysis and QC GENES</b>       | Number of genes expressed at > 2 counts in > 2 cells              | 18791                       | 17850                                        | 14458               |
|                                             | Number of genes retained after removing cell cycle genes          | 18181                       | 17237                                        | 13920               |
|                                             | Number of protein-coding genes retained                           | 12406                       | 12137                                        | 10346               |
| <b>Whole dataset (all cells, all genes)</b> | <b>Hierarchical Clustering</b>                                    | <b>Figure 3F, S3H</b>       | <b>Figure F, S4J</b>                         | <b>Figure S4N</b>   |
|                                             | Cells in analysis                                                 | 262                         | 244                                          | 116                 |
|                                             | Genes retained for analysis by SC3                                | 6,846                       | 6,838                                        | 7,265               |
|                                             | Clustering solutions explored                                     | 2:10                        | 2:15                                         | 2:15                |
|                                             | Clustering solution                                               | 10                          | 15                                           | 8                   |
|                                             | Average Silhouette width                                          | 0.45                        | 0.58                                         | 0.27                |
|                                             | Highest cluster stability index                                   | 0.63                        | 0.7                                          | 0.4                 |
|                                             | Marker gene p value threshold                                     | 0.01                        | 0.01                                         | 0.05                |
|                                             | AUROC threshold                                                   | 0.75                        | 0.85                                         | 0.7                 |
|                                             | <b>tSNE</b>                                                       | <b>Figure 3E-G</b>          | <b>Figure 4E-G, S4I</b>                      | <b>Figure S4O-P</b> |
|                                             | Cells in analysis                                                 | 262                         | 244                                          | 116                 |
|                                             | Genes in analysis                                                 | 6,846                       | 6,838                                        | 7,265               |
|                                             | PC for tSNE                                                       | 10                          | 20                                           | 5                   |
|                                             | Total variance explained by PCs selected for tSNE                 | 25                          | 35                                           | 26                  |
|                                             | Perplexity setting for tSNE                                       | 13                          | 15                                           | 20                  |
|                                             | <b>Diffusion Map</b>                                              | <b>Figure 3H-I</b>          | <b>Figure 4H-I</b>                           |                     |
|                                             | Number of PC selected for diffusion map                           | 20                          | 10                                           |                     |
| <b>Partial dataset (cell subsets)</b>       | <b>Hierarchical Clustering</b>                                    | <b>Figure 3D (GMP only)</b> | <b>Figure 1H (mature DC only, all genes)</b> |                     |
|                                             | Cells in analysis                                                 | 58                          | 88                                           |                     |
|                                             | Genes retained for analysis by SC3                                | 6,846                       | 6,838                                        |                     |
|                                             | Clustering solutions explored                                     | 2:15                        | 2:15                                         |                     |
|                                             | Clustering solution                                               | 4                           | 8                                            |                     |
|                                             | Average Silhouette width                                          | 0.5                         | 0.67                                         |                     |

|                                                |                                                   |                     |                                                 |  |
|------------------------------------------------|---------------------------------------------------|---------------------|-------------------------------------------------|--|
|                                                | Highest cluster stability index                   | 0.3                 | 0.8                                             |  |
|                                                | Marker gene p value threshold                     | 0.1                 | 0.01                                            |  |
|                                                | AUROC threshold                                   | 0.75                | 0.85                                            |  |
|                                                | <b>tSNE</b>                                       | <b>Figure S3E-G</b> |                                                 |  |
|                                                | Cells in analysis                                 | 58                  |                                                 |  |
|                                                | Genes in analysis                                 | 6,846               |                                                 |  |
|                                                | PC for tSNE                                       | 5                   |                                                 |  |
|                                                | Total variance explained by PCs selected for tSNE | 30                  |                                                 |  |
|                                                | Perplexity setting for tSNE                       | 13                  |                                                 |  |
| <b>Partial dataset (cell and gene subsets)</b> | <b>Hierarchical Clustering</b>                    |                     | <b>Figure S1K (mature DC only, DC2/3 genes)</b> |  |
|                                                | Cells in analysis                                 |                     | 88                                              |  |
|                                                | Genes retained for analysis by SC3                |                     | 61 out of 71 genes found in Villani et al.      |  |
|                                                | Clustering solutions explored                     |                     | 2:15                                            |  |
|                                                | Clustering solution                               |                     | 7                                               |  |
|                                                | Average Silhouette width                          |                     | 0.53                                            |  |
|                                                | Highest cluster stability index                   |                     | 0.75                                            |  |
|                                                | Marker gene p value threshold                     |                     | 0.05                                            |  |
|                                                | AUROC threshold                                   |                     | 0.75                                            |  |
|                                                | <b>tSNE</b>                                       |                     | <b>Figure S1L (71 DC2/3 genes)</b>              |  |
|                                                | Cells in analysis                                 |                     | 88                                              |  |
|                                                | Genes in analysis                                 |                     | 71                                              |  |
|                                                | PC for tSNE                                       |                     | 35                                              |  |
|                                                | Perplexity setting for tSNE                       |                     | 15                                              |  |

**Table S4. Cell input/output and donor details for *in vitro* DC Culture experiments (related to figures 3, 4, S3, S4).**

| Figure                                   | Input subset | Donor | Input Cell No | Output Cell No |           |           |      |      |
|------------------------------------------|--------------|-------|---------------|----------------|-----------|-----------|------|------|
|                                          |              |       |               | Mono           | CD14+ DC3 | CD14- DC2 | cDC1 | pDC  |
| <b>CD34+ Progenitor analysis 3C, S3B</b> | Bulk CD34+   | 1     | 1000          | 243            | 393       | 7515      | 1690 | 408  |
|                                          |              | 1     | 3258          | 529            | 1614      | 5617      | 217  | 12   |
|                                          |              | 1     | 3258          | 554            | 1081      | 2037      | 275  | 9    |
|                                          |              | 2     | 496           | 10             | 343       | 1332      | 44   | 24   |
|                                          |              | 3     | 500           | 868            | 3520      | 1250      | 355  | 50   |
|                                          |              | 3     | 3090          | 53             | 262       | 742       | 180  | 120  |
|                                          |              | 3     | 3090          | 27             | 265       | 844       | 145  | 33   |
|                                          |              | 3     | 3090          | 400            | 374       | 288       | 145  | 65   |
|                                          |              | 4     | 2600          | 208            | 1588      | 8185      | 347  | 179  |
|                                          |              | 4     | 1642          | 0              | 22        | 1256      | 125  | 138  |
|                                          |              | 5     | 792           | 6              | 295       | 4664      | 712  | 106  |
|                                          |              | 6     | 800           | 94             | 328       | 1583      | 91   | 23   |
|                                          |              | 7     | 6200          | 355            | 2250      | 2556      | 195  | 57   |
|                                          |              | 8     | 3135          | 45             | 838       | 2783      | 624  | 50   |
|                                          |              | 8     | 3135          | 53             | 367       | 1014      | 279  | 8    |
|                                          |              | 8     | 3248          | 56             | 61        | 424       | 67   | 14   |
|                                          |              | 9     | 3056          | 46             | 1477      | 4577      | 315  | 51   |
|                                          |              | 10    | 1712          | 6              | 625       | 706       | 11   | 7    |
|                                          |              | 10    | 2911          | 29             | 1574      | 2650      | 17   | 66   |
|                                          |              | 10    | 2911          | 802            | 4996      | 1925      | 43   | 37   |
|                                          |              | 11    | 848           | 0              | 10        | 120       | 10   | 6    |
|                                          |              | 12    | 1343          | 5250           | 5734      | 1043      | 0    | 0    |
|                                          |              | 13    | 446           | 22             | 1854      | 343       | 0    | 0    |
|                                          | CMP          | 1     | 3362          | 122            | 301       | 95        | 0    | 0    |
|                                          |              | 1     | 1426          | 31             | 272       | 33        | 0    | 0    |
|                                          |              | 2     | 500           | 12             | 0         | 0         | 0    | 0    |
|                                          |              | 4     | 1558          | 0              | 0         | 1489      | 0    | 2    |
|                                          |              | 5     | 2409          | 0              | 210       | 120       | 0    | 0    |
|                                          |              | 14    | 3040          | 0              | 1         | 0         | 0    | 0    |
|                                          |              | 14    | 1646          | 51             | 99        | 11        | 1    | 0    |
|                                          | GMP33+       | 1     | 2000          | 643            | 4369      | 11989     | 1511 | 51   |
|                                          |              | 2     | 507           | 324            | 1570      | 397       | 2    | 0    |
|                                          |              | 3     | 500           | 1538           | 4467      | 4346      | 633  | 226  |
|                                          |              | 4     | 1168          | 142            | 1572      | 12966     | 24   | 20   |
|                                          |              | 5     | 1670          | 144            | 1169      | 2211      | 271  | 52   |
|                                          |              | 6     | 669           | 858            | 99        | 39        | 0    | 0    |
|                                          |              | 6     | 70            | 140            | 20        | 0         | 0    | 0    |
|                                          | LMPP         | 1     | 1500          | 126            | 605       | 3546      | 3589 | 827  |
|                                          |              | 1     | 2957          | 150            | 223       | 1525      | 1277 | 757  |
|                                          |              | 2     | 502           | 238            | 618       | 6479      | 714  | 413  |
|                                          |              | 3     | 428           | 99             | 298       | 7017      | 4556 | 3800 |
|                                          |              | 4     | 215           | 0              | 6         | 9628      | 358  | 778  |
|                                          |              | 5     | 1729          | 2              | 21        | 7262      | 793  | 993  |
|                                          |              | 14    | 1708          | 7              | 105       | 2439      | 169  | 86   |

|                                                                  |                                    |    |      |     |      |      |      |     |
|------------------------------------------------------------------|------------------------------------|----|------|-----|------|------|------|-----|
|                                                                  | GMP33-                             | 1  | 3042 | 268 | 750  | 456  | 451  | 178 |
|                                                                  |                                    | 3  | 558  | 37  | 511  | 3541 | 2649 | 480 |
|                                                                  |                                    | 4  | 364  | 0   | 246  | 1148 | 495  | 59  |
|                                                                  |                                    | 5  | 848  | 22  | 194  | 2998 | 437  | 77  |
|                                                                  |                                    | 10 | 502  | 0   | 27   | 30   | 36   | 23  |
|                                                                  |                                    | 14 | 1709 | 4   | 64   | 163  | 205  | 34  |
|                                                                  | GMP123low                          | 3  | 550  | 9   | 278  | 1502 | 119  | 222 |
|                                                                  |                                    | 4  | 419  | 0   | 10   | 192  | 23   | 52  |
|                                                                  |                                    | 5  | 491  | 1   | 19   | 363  | 145  | 40  |
|                                                                  | GMP123med                          | 1  | 700  | 0   | 35   | 271  | 709  | 234 |
|                                                                  |                                    | 1  | 2462 | 0   | 54   | 37   | 466  | 159 |
|                                                                  |                                    | 3  | 445  | 0   | 52   | 65   | 394  | 39  |
|                                                                  |                                    | 4  | 252  | 0   | 9    | 191  | 45   | 134 |
|                                                                  |                                    | 5  | 152  | 0   | 34   | 138  | 190  | 37  |
|                                                                  |                                    | 10 | 953  | 0   | 6    | 10   | 20   | 2   |
|                                                                  |                                    | 14 | 497  | 0   | 0    | 3    | 4    | 4   |
|                                                                  |                                    | 15 | 1913 | 26  | 75   |      | 312  | 158 |
| <b>CD34<sup>med</sup><br/>Precursor<br/>analysis<br/>4B, S4C</b> | 123high<br>303/4low                | 1  | 2182 | 0   | 12   | 202  | 75   | 191 |
|                                                                  |                                    | 1  | 2182 | 0   | 5    | 150  | 73   | 35  |
|                                                                  |                                    | 8  | 1622 | 0   | 0    | 7    | 40   | 30  |
|                                                                  |                                    | 8  | 1622 | 0   | 1    | 23   | 23   | 2   |
|                                                                  |                                    | 16 | 1521 | 0   | 0    | 2    | 5    | 50  |
|                                                                  |                                    | 17 | 1126 | 0   | 2    | 11   | 1    | 57  |
|                                                                  | CD2+<br>pre-pDC                    | 15 | 1229 | 0   | 0    | 2    | 10   | 181 |
|                                                                  |                                    | 16 | 1005 | 0   | 1    | 2    | 4    | 84  |
|                                                                  |                                    | 16 | 1005 | 0   | 1    | 6    | 1    | 103 |
|                                                                  |                                    | 17 | 536  | 0   | 0    | 1    | 0    | 55  |
|                                                                  |                                    | 17 | 536  | 0   | 0    | 0    | 0    | 49  |
|                                                                  | CD123high<br>CD5+ early<br>pre-DC2 | 1  | 434  | 0   | 0    | 10   | 0    | 0   |
|                                                                  |                                    | 5  | 444  | 0   | 14   | 65   | 4    | 1   |
|                                                                  |                                    | 8  | 469  | 0   | 5    | 41   | 0    | 0   |
|                                                                  |                                    | 8  | 1194 | 0   | 4    | 97   | 1    | 3   |
|                                                                  | CD123med<br>CD5+<br>pre-DC2        | 3  | 548  | 1   | 113  | 108  | 0    | 3   |
|                                                                  |                                    | 4  | 717  | 0   | 0    | 11   | 2    | 1   |
|                                                                  |                                    | 8  | 679  | 0   | 2    | 34   | 0    | 0   |
|                                                                  |                                    | 8  | 483  | 0   | 0    | 4    | 0    | 0   |
|                                                                  | CD34med<br>CD123med<br>SIRPA-      | 1  | 683  | 0   | 16   | 64   | 159  | 0   |
|                                                                  |                                    | 9  | 1596 | 0   | 36   | 54   | 156  | 8   |
|                                                                  |                                    | 18 | 630  | 0   | 0    | 16   | 29   | 3   |
|                                                                  |                                    | 19 | 1701 | 0   | 13   | 54   | 144  | 194 |
|                                                                  | CD34med<br>SIRPA+                  | 3  | 3818 | 16  | 109  | 39   | 18   | 0   |
|                                                                  |                                    | 8  | 3040 | 15  | 27   | 0    | 0    | 0   |
|                                                                  |                                    | 10 | 2703 | 59  | 295  | 29   | 0    | 0   |
|                                                                  |                                    | 15 | 1802 | 0   | 24   | 30   | 0    | 0   |
|                                                                  |                                    | 20 | 869  | 18  | 2557 | 118  | 8    | 0   |
|                                                                  | SIRPA+CD2+<br>pre-DC3              | 3  | 4045 | 2   | 6    | 1    | 0    | 0   |
|                                                                  |                                    | 4  | 329  | 0   | 21   | 17   | 0    | 0   |
|                                                                  |                                    | 5  | 2449 | 18  | 37   | 13   | 0    | 0   |
|                                                                  |                                    | 10 | 2724 | 6   | 6    | 1    | 0    | 0   |
|                                                                  | SIRPA+CD2-<br>pre-mono             | 3  | 4942 | 14  | 5    | 0    | 0    | 0   |
|                                                                  |                                    | 10 | 3176 | 4   | 3    | 1    | 0    | 0   |
|                                                                  |                                    | 15 | 4966 | 1   | 0    | 0    | 0    | 0   |
|                                                                  |                                    | 20 | 1419 | 6   | 810  | 53   | 1    | 0   |

Figure S1, related to Figure 1

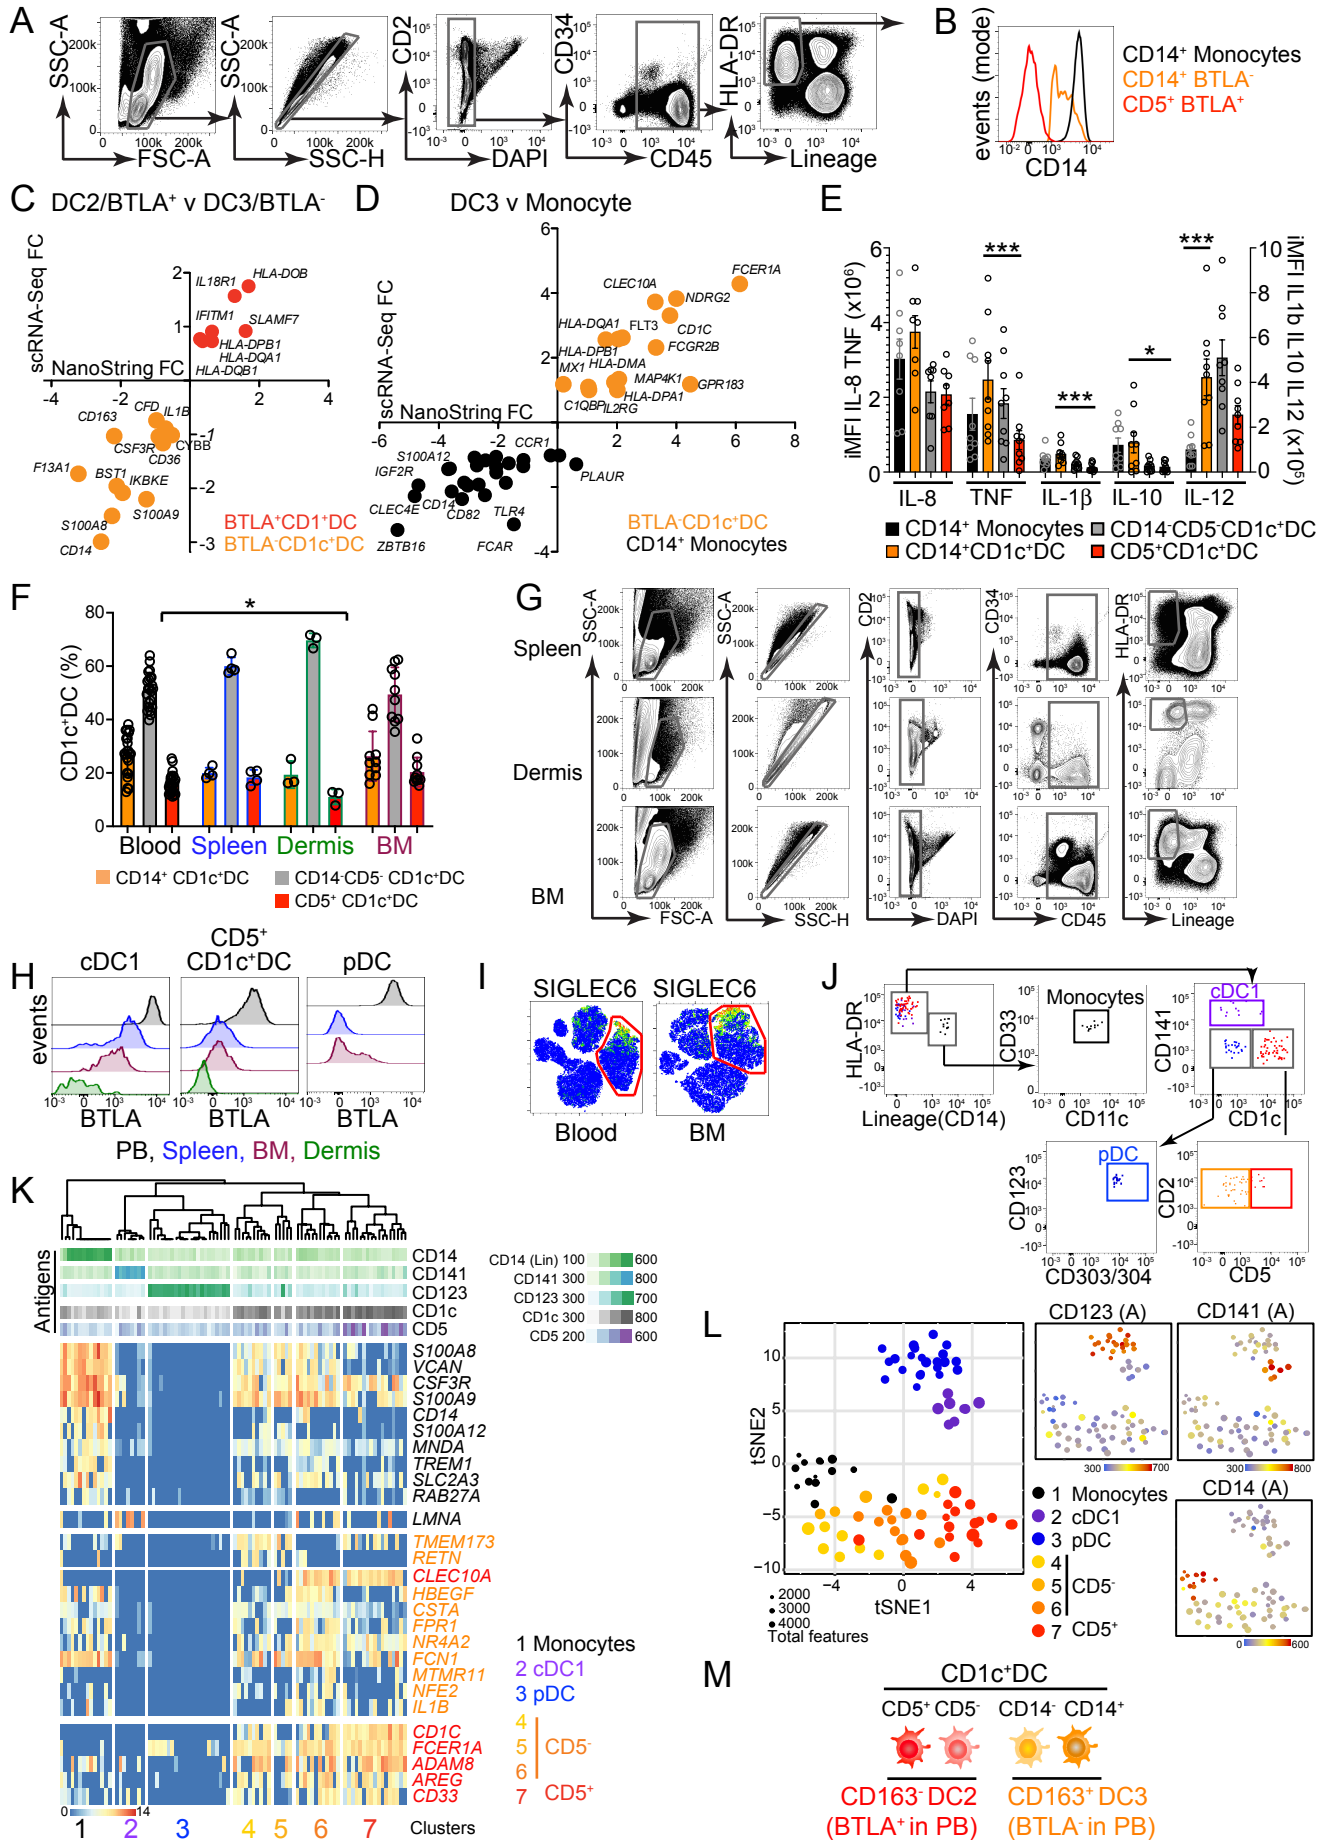

**Figure S1: CD1c+DC heterogeneity is evident in human bone marrow**

A. Upstream gating steps for the flow cytometric analysis of HC PB monocyte and DC subsets identified PBMC by light scatter properties, excluded doublets, dead and CD45<sup>-</sup> cells before lin(CD3, CD16, CD19, CD20, CD56)-HLA-DR<sup>+</sup> cells were selected for further analysis in **Figure 1A**. Representative example of n=22

B. Histogram of CD14 expression on CD5<sup>+</sup>BTLA<sup>+</sup>CD1c<sup>+</sup>DCs (red), CD14<sup>+</sup>CD1c<sup>+</sup>DCs (orange) and CD14<sup>+</sup>CD88<sup>+</sup> monocytes (black), by flow cytometric analysis

C. Correlation of expression fold change of differentially expressed genes by NanoString analysis with the fold change of differentially expressed genes in single cell RNA-Seq analysis described by Villani et al., comparing BTLA<sup>+</sup>CD1c<sup>+</sup>DCs (red) (mean of n=3) and BTLA<sup>-</sup>CD1c<sup>+</sup>DCs (orange) (mean of n=3) with DC2 and DC3 described by Villani et al. 2017.

D. Correlation of expression fold change of differentially expressed genes by NanoString analysis with the fold change of differentially expressed genes in single cell RNA-Seq analysis described by Villani et al., comparing BTLA<sup>-</sup>CD1c<sup>+</sup>DCs (orange) (mean of n=3) and monocytes (black) (mean of n=3) with DC3 and monocytes described by Villani et al. 2017.

E. Intracellular flow cytometric analysis of *in vitro* cytokine elaboration by PB monocytes (black), CD14<sup>+</sup>CD1c<sup>+</sup>DC (orange), CD14<sup>-</sup>CD5<sup>-</sup>CD1c<sup>+</sup>DC (gray) and CD5<sup>+</sup>CD1c<sup>+</sup>DC (red) from n=9 healthy donors in response to 14hrs stimulation with TLR agonists (CpG, poly(I:C), CL075, LPS). Integrated median fluorescence intensity (iMFI) was calculated by multiplying the frequency of positive cells by the MFI of a given marker. P values were derived from paired two-tailed t-tests (\* p<0.05; \*\*p<0.01; \*\*\*p<0.005). Bars show mean±SEM and circles represent individual donors.

F. Relative proportions of CD5<sup>+</sup>CD1c<sup>+</sup>DCs (red), CD14<sup>+</sup>CD1c<sup>+</sup>DCs (orange) and CD14<sup>-</sup>CD5<sup>-</sup>CD1c<sup>+</sup>DCs (gray) in HC PB (n=22) and BM (n=13) expressed as a percentage of the total CD1c<sup>+</sup>DC (gated as shown in **Figure 1A**). \* p=0.046 (Mann Whitney U, two-tailed). Bars show mean±SD and circles represent individual donors.

G. Upstream gating steps for the flow cytometric analysis of HC spleen, skin (dermis) and BM monocyte and DC subsets identified mononuclear cells by light scatter properties, excluded doublets, dead and CD45<sup>-</sup> cells before lin(CD3, CD16, CD19, CD20, CD56)-HLA-DR<sup>+</sup> cells were selected for further analysis in **Figure 1E** (representative example of n=3 for each tissue) and **F** (representative example of n=13)

H. Histograms of BTLA expression on cDC1, CD5<sup>+</sup>CD1c<sup>+</sup>DC and pDC from PB, spleen, BM and dermis (pDC absent), by flow cytometric analysis.

I. tSNE visualization of the expression of TFs IRF4 and IRF8 and surface markers across HC PB and BM lin(CD3,19,20,56,161)-HLA-DR<sup>+</sup> cells by simultaneous CyTOF analysis as in **Figure 1G**. Heat map shows SIGLEC6 expression.

J. Flow cytometric identification of index sorted human BM DC and monocytes for single cell transcriptomic analysis in **Figure 1H** and **S1K,L**.

K. Hierarchical clustering of single cell transcriptomes of mature DC from BM using 71 DC2 and DC3 marker genes identified in Villani et al. to define 7 clusters used to annotate **Figure S1L** (in SC3 software  $p < 0.05$ , AUROC  $> 0.75$ ). Heatmap shows log2 expression. Genes enriched in DC2 or DC3 are shown in red and orange type, respectively. The top rows display fluorescence intensity of surface antigens ('Antigens') from index sorted cells.

L. tSNE plots of the first 35 principal components of the DC2 and DC3 single cell transcriptome dataset (as described in **J,K**) of index sorted pDC, cDC1, CD1c+DC and monocytes. The large panel depicts cells annotated by 7 clusters generated in **K**. Smaller panels show the expression of key subset-specific antigens taken from indexed flow cytometry.

M. Schematic of the phenotypic definition of DC2 and DC3 in PB and tissues; CD163-CD5+/- (BTLA+ in PB) DC2 and CD163+CD14+/- (BTLA- in PB) DC3.

Figure S2, related to Figure 2

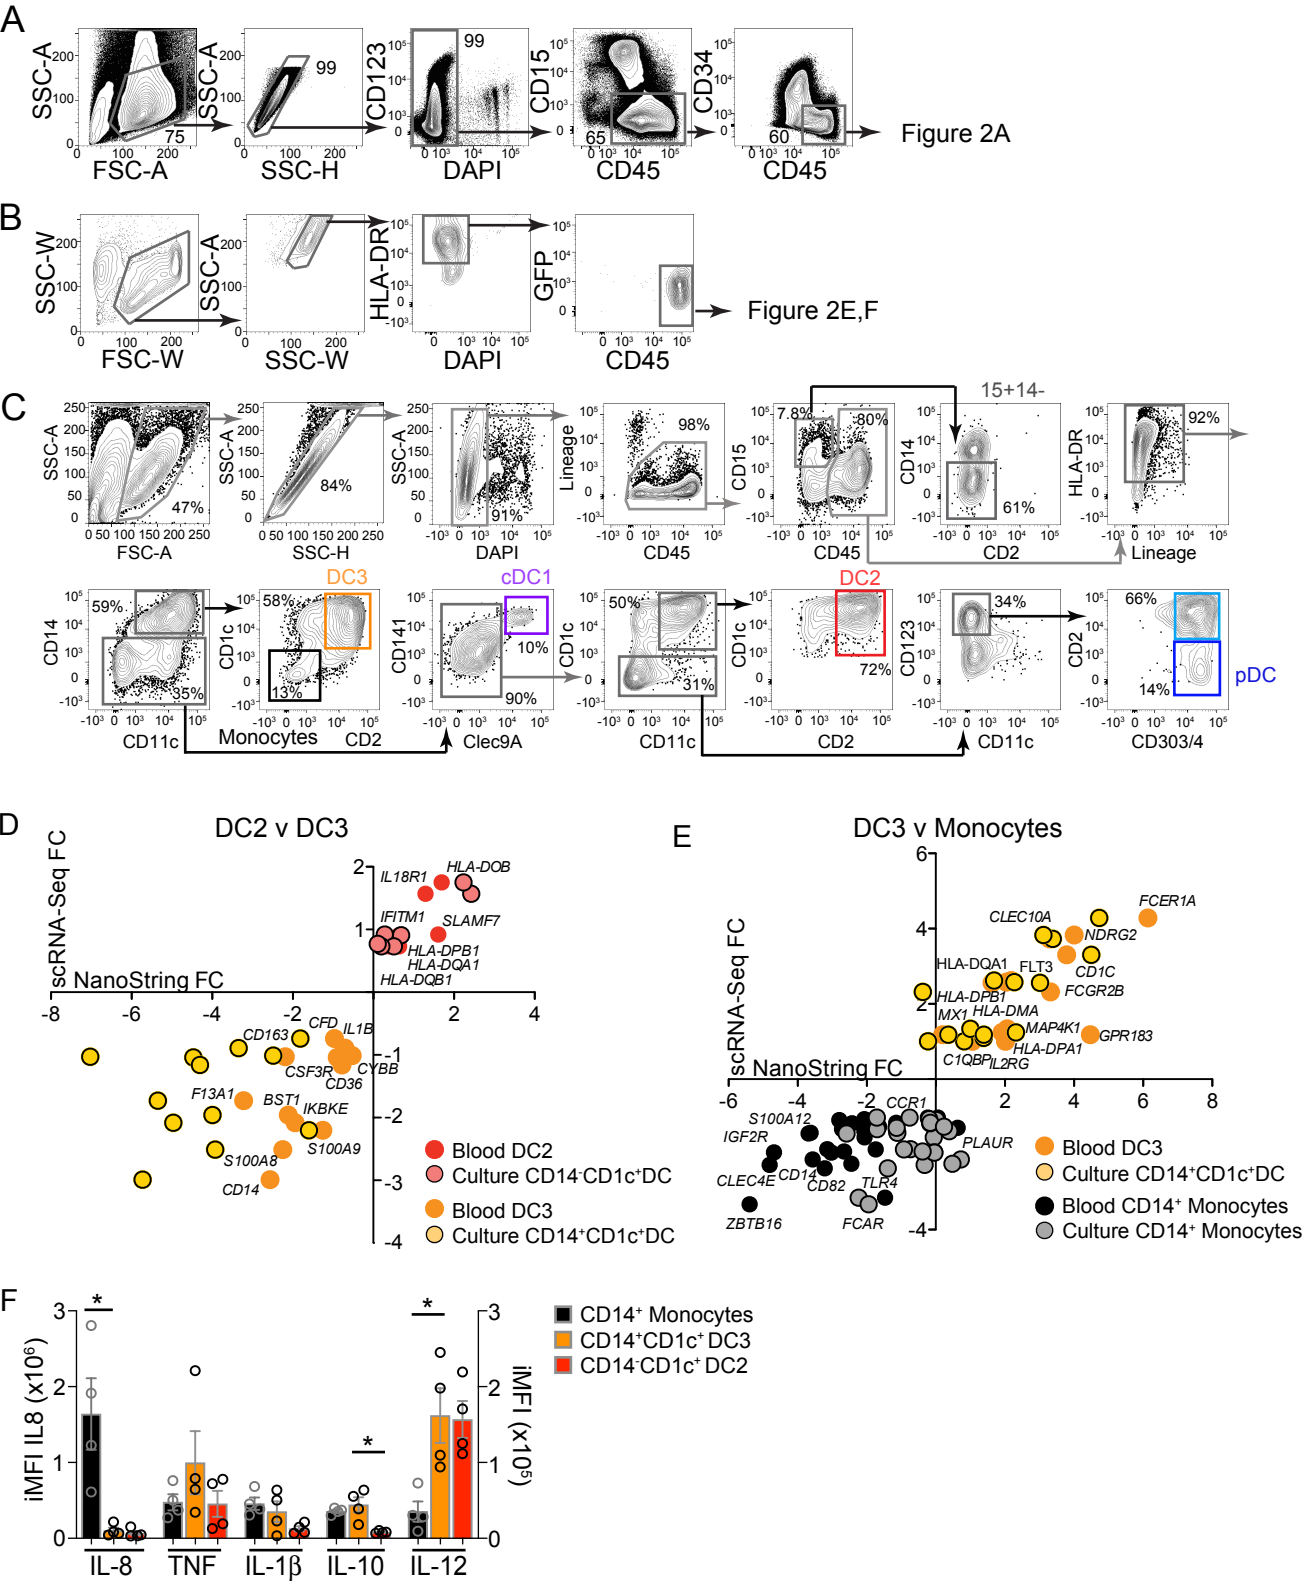

**Figure S2: CD14 expression distinguishes between CD1c+DC subsets generated *in vitro***

A. Upstream gating steps for the flow cytometric analysis of *in vitro* derived DC and monocyte subsets. Gates identified live, singlet, cells and excluded CD15<sup>+</sup> neutrophils and CD34<sup>+</sup> progenitors before DC and monocyte identification as shown in **Figure 2A**.

B. Upstream gating steps for the analysis of FACS-purified CD1c+DC subsets after 7 days of culture (**Figure 2E,F**). A representative example of the upstream gating from the culture output of CD14-BTLA-DC3 (n=7).

C. Full gating strategy for FACS-purification of *in vitro* generated DC and monocyte subsets derived from BM CD34<sup>+</sup> progenitors after 21 days in culture, for NanoString gene expression analysis (**Figure 2G,H**) and TLR elaboration (**Figure 2I**).

D, E. Correlation of expression fold change of differentially expressed genes by NanoString analysis with the fold change of differentially expressed genes in single cell RNA-Seq described by Villani et al. (in a similar analysis to **Figure S1**), comparing D) DC2 (red) and DC3 (orange) or E) DC3 and monocytes (black). PB DC (BTLA+CD1c+DC2 and BTLA-CD1c+DC3) and their culture-derived counterparts (CD14-CD1c+DC2 and CD14+CD1c+DC3, outlined dots) are shown. Fold change derived from mean expression of n=3 for PB and n=3 for culture-derived cells.

F. Intracellular flow cytometric analysis of *in vitro* cytokine elaboration by CD14<sup>+</sup>1c<sup>+</sup> monocytes (black), CD14<sup>+</sup>CD1c<sup>+</sup>DC3 (orange) and CD14<sup>+</sup>CD1c<sup>+</sup>DC2 (red) generated from n=4 BM donors after 21 days in culture, in response to TLR agonists (CpG, poly(I:C), CL075, LPS). Integrated median fluorescence intensity (iMFI) was calculated by multiplying the frequency of positive cells by the MFI of a given marker. P values were derived from paired two-tailed t-tests (\* p<0.05). Bars show mean±SEM and circles represent individual donors.

Figure S3, related to Figure 3

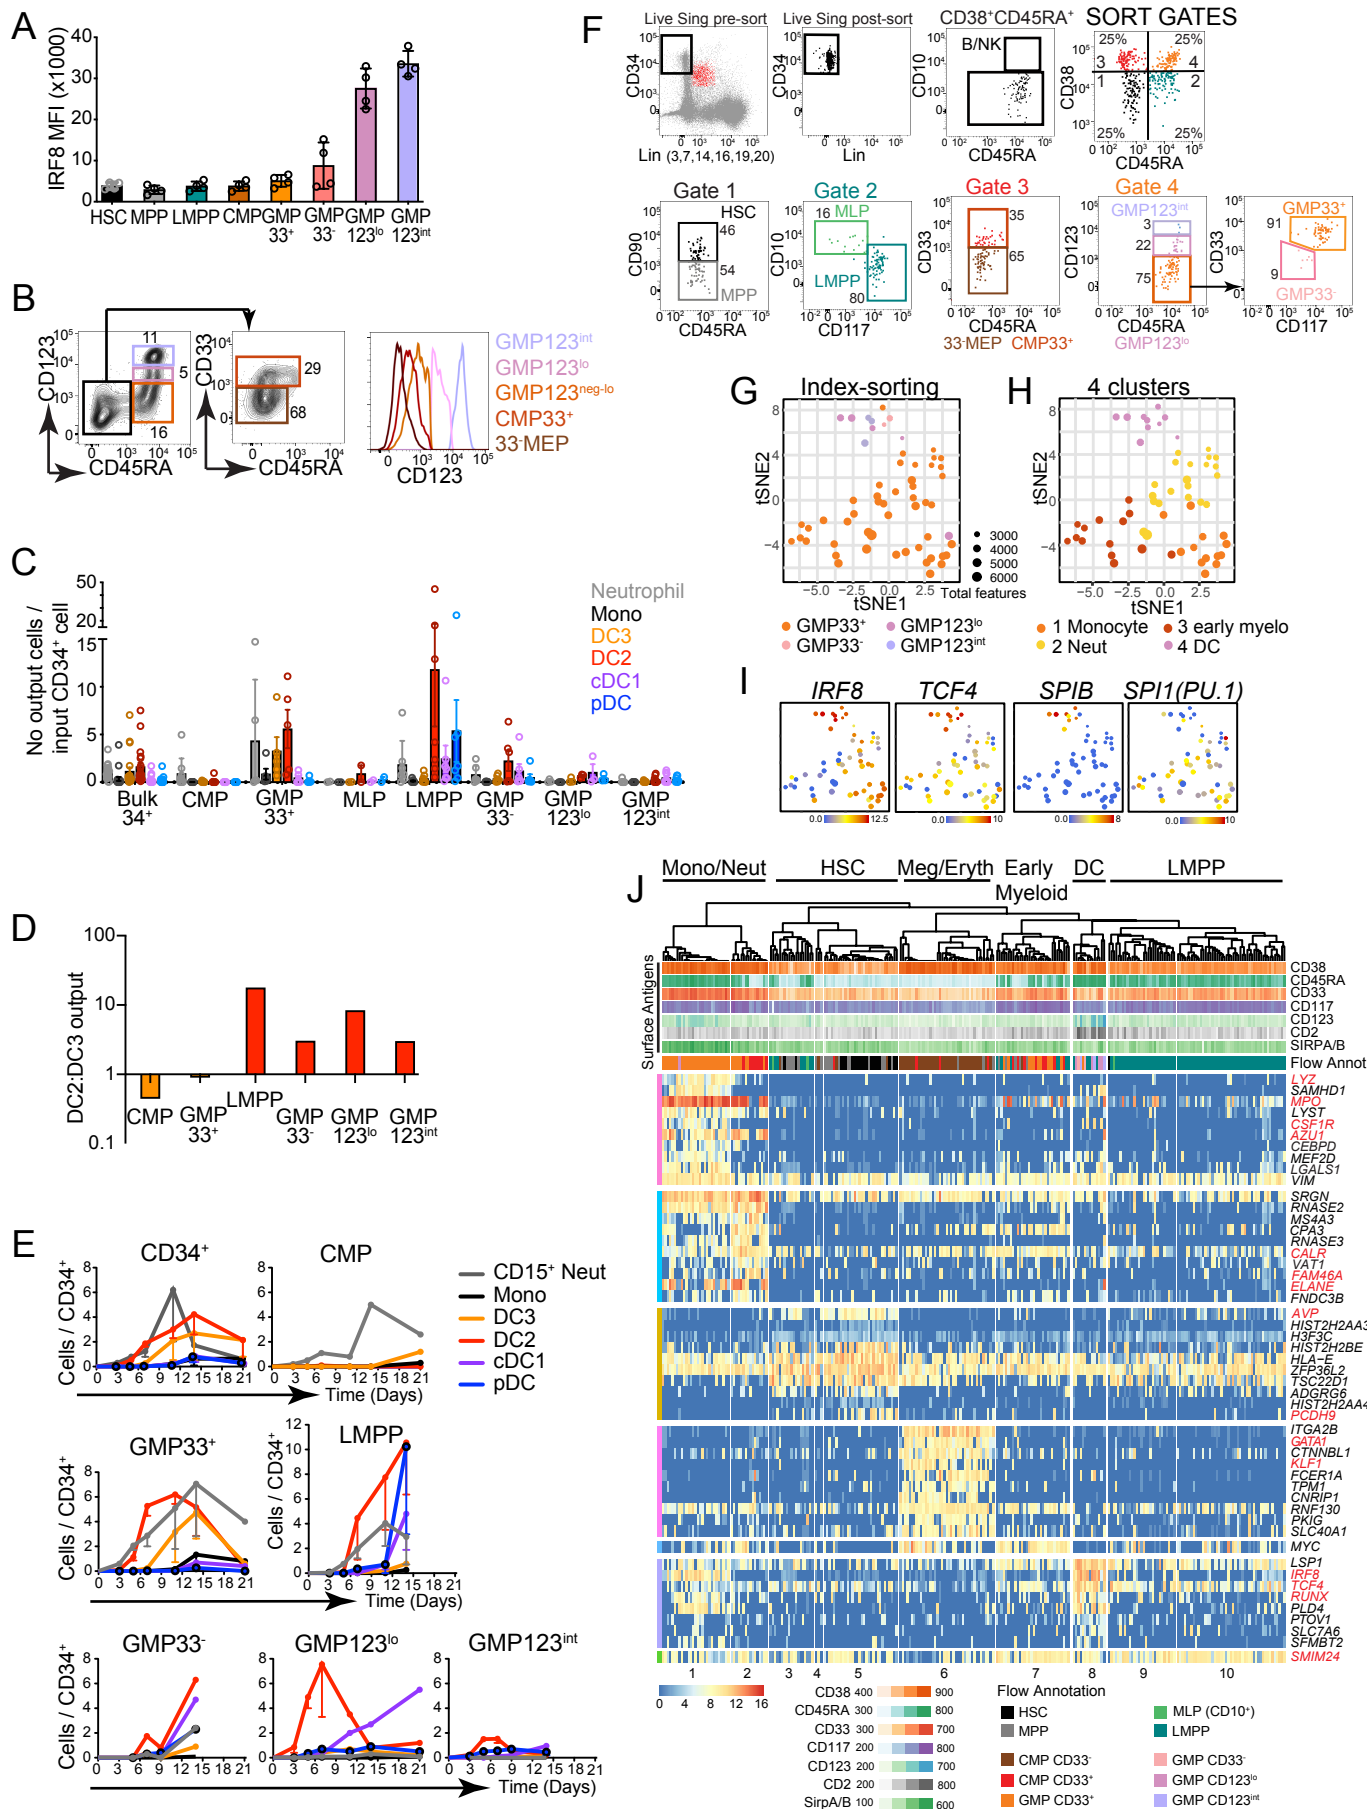

### Figure S3. High IRF8 expression defines LMPP-associated DC progenitors

A. Median Fluorescence intensity of Intracellular IRF8 by flow analysis across gates identifying CD34<sup>+</sup>progenitor populations of HC BM (n=4). HSC, hematopoietic stem cell; MPP, multipotent progenitor; MEP, megakaryocyte erythroid progenitor; MLP, multilymphoid progenitor; LMPP, lymphoid primed multipotent progenitor; CMP, common myeloid progenitor; GMP, granulocyte macrophage progenitor. Bars represent mean±SD.

B. Flow analysis of CD34<sup>+</sup>CD38<sup>+</sup>CD10<sup>-</sup> progenitor populations (as shown in **Figure 3A**) showing the relative levels of CD123 expression across CD33<sup>+</sup>CD123<sup>neg-lo</sup> (predicted CMP) and CD33<sup>-</sup>CD123<sup>-</sup> (predicted MEP) CD45RA<sup>-</sup> populations and CD45RA<sup>+</sup>GMP fractions.

C. Absolute proliferative capacity and differentiation potential of progenitor fractions subjected to 14 days in DC differentiation culture, as depicted in **Figure 3C**, expressed as the number of cells generated per input CD34<sup>+</sup> cell. CD15<sup>+</sup> neutrophils are included. Bars show mean±SEM, circles represent individual donors.

D. The relative output (ratio) of DC2 and DC3 from the specified CD34<sup>+</sup>progenitor fractions. Orange bars DC2<DC3; red bars DC2>DC3.

E. Kinetics of DC, monocyte and neutrophil output from progenitor fractions over 14-21 days in DC differentiation culture. CD34<sup>+</sup> n=3 (n=2-3/timepoint), CMP n=1, GMP33<sup>+</sup> n=3 (n=1-3/timepoint), LMPP n=3 (n=2-3/timepoint), GMP33<sup>-</sup> n=3 (n=1-2/timepoint), GMP123<sup>lo</sup> n=2 (n=1-2/timepoint), GMP123<sup>int</sup> n=3 (n=1-3/timepoint). Dots and bars represent mean±SEM.

F. Flow identification of index sorted human BM progenitors for single cell transcriptomic analysis in **Figures 3D-J and S3G-J**. A tight lin(CD3, 7, 14, 16, 19, 20)<sup>-</sup> gate was used to select CD34<sup>+</sup> progenitors for single cell sorting. This excluded lineage<sup>lo</sup> CD10<sup>+</sup>B/NK progenitors, as defined in **Figure 3A**, shown backgated (red dots) onto the pre-sort BM live, singlet, mononuclear cells (gray). Top middle panel shows the same Lin<sup>-</sup>34<sup>+</sup> gate on sorted single cells. Top right panel demonstrates the absence of CD10<sup>+</sup>B/NK cells in the sorted CD38<sup>+</sup>CD45RA<sup>+</sup> population.

G-I. tSNE visualization of the first 5 principal components (30% total variance) of the transcriptomes of 58 single GMP, analyzed independently of surface phenotype. tSNE plots are annotated by **G**, gate of origin from index-linked flow (**Figure S3F**) or **H**, 4 hierarchical clusters (**Figure 3D**) showing clustering of cells from the CD33<sup>-</sup>, CD123<sup>lo</sup>, and CD123<sup>int</sup> gates (cluster 4) away from clusters 1-3 containing GMP33<sup>+</sup> cells. Heatmaps (**I**) show log2 expression of key DC TF genes on tSNE plot in **G** and **H**.

J. Unsupervised hierarchical clustering of single cell transcriptomes of all progenitor cells, using all protein-coding, non-cell cycle genes (independent of surface antigen expression). Marker genes for 10 clusters generated within SC3 (p<0.01, AUROC>0.75) are displayed, examples of which identify cluster 1, monocyte (*LYZ*, *CSF1R*); cluster 2, granulocyte (*CALR*, *ELANE*), clusters 3-5, HSC and MPP (*AVP*, *PCDH9*), cluster 6, MEP (*GATA1*, *KLF1*), cluster 8, DC (*IRF8*, *TCF4*, *RUNX*), clusters 9-10, LMPP (*SMIM24*). Heatmap shows log2 gene expression. The top rows display fluorescence intensity of surface antigens ('Surface Antigens') from index sorted cells, 'Flow annotation (Flow annot)' denotes the classification of index sorted cells by their surface phenotype (**Figure S3F**).

[illegible]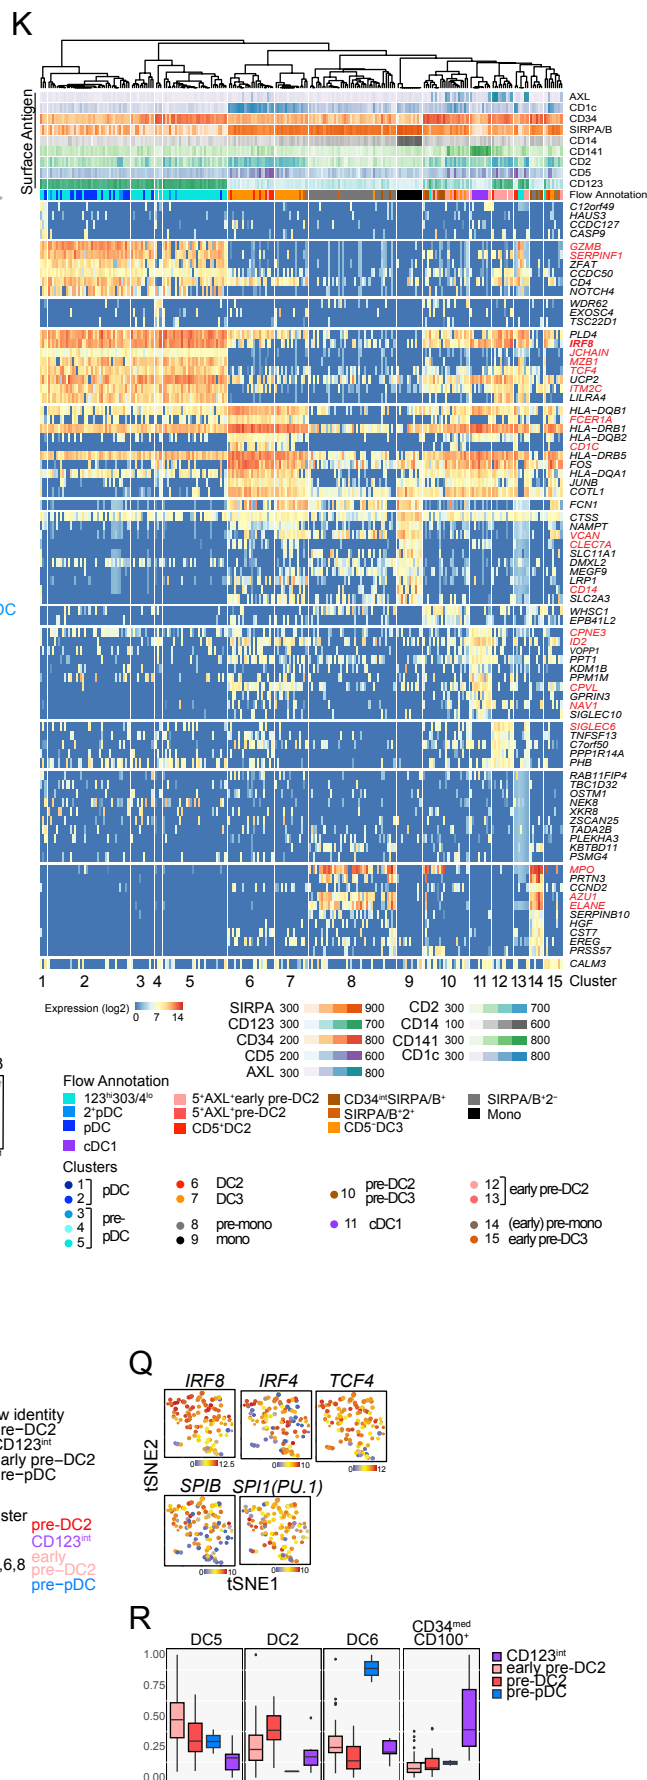

**Figure S4. Two trajectories of DC development connect the progenitor compartment with mature DC**

A. Heatmaps showing IRF8 expression by intracellular flow cytometric analysis across sequential bivariate plots, using the gating strategy to identify DC and pre-DC shown in **Figure 4A**. Heatmaps generated in FlowJo 10.6.1.

B. Absolute proliferative capacity and differentiation potential of CD34<sub>int</sub> precursor fractions subjected to 14 days in DC differentiation culture, as depicted in **Figure 4C**, expressed as the number of cells generated per input precursor cell. CD15<sup>+</sup> neutrophils are included. Bars show mean $\pm$ SEM, circles represent individual donors.

C. The relative output (ratio) of DC2 versus DC3 (left graph) or Monocyte versus DC3 (right graph) from the specified CD34<sub>int</sub> precursor fractions. Red bars DC2>DC3; orange bars DC3>DC2, black bars with orange outline DC3>monocyte.

D. Mean fluorescence intensity (MFI) of CD34 by flow cytometric analysis of CD2<sup>+</sup> and CD2<sup>-</sup> pDC from BMMC (n=3) and PBMC (n=3). Plots show mean $\pm$ SEM.

E. CFSE dilution in CD2<sup>+</sup> and CD2<sup>-</sup> pDC from BM and PB after 3 days in DC culture, to assess proliferation. Histograms show CD34<sup>+</sup> progenitors and monocytes as controls. Plots shown are representative of n=3 experiments in PB and BM.

F. Kinetics of the output generated from 14 days culture of CD2<sup>+</sup> pDC, expressed as the number of cells generated per input cell. n=2 donors with n=2 analyses at each time point. Dots and bars show mean $\pm$ SEM.

G. Flow cytometric analysis of Lin-HLA-DR<sup>+</sup>CD1c<sup>-</sup>CD141<sup>-</sup>CD123<sub>hi</sub> PBMC and BMMC showing the location of AXL<sup>+</sup>CD5<sup>+</sup>CD123<sup>+</sup>CD11c<sup>-</sup> early pre-DC2 (pink) on the bivariate plot of CD2 versus CD303/4, overlying the CD34<sub>int</sub> CD123<sub>hi</sub>CD303/4<sub>lo</sub> population (turquoise).

H. Summary of the proliferative capacity of BM DC precursors. BMMCs were CFSE stained then precursors FACS-purified and cultured in DC-culture conditions for 3 days before flow cytometric analysis of CFSE. Bulk CD34<sup>+</sup> progenitors and CD14<sup>+</sup> monocytes were included as positive and negative controls, respectively. Bars represent mean $\pm$ SD of n=3-4 donors, circles represent individual donors.

I. Location, in flow cytometry parameter space, of index-sorted precursor cells purified for scRNA-Seq depicted in **Figure 4E-J, S4J-K**.

J. DC subset signature scores generated from Villani et al, mapped across the tSNE plot of precursor and mature DC single cell transcriptomes (**Figure 4E-J**). To generate signature scores, the dataset was mined for expression of cell subset 'signature' genes defined by single cell RNA-Seq in Villani et al., including DC1 (cDC1), DC2 (cDC2a), DC3 (cDC2b), DC5 (AXL<sup>+</sup>), DC6 (pDC) and monocytes. Normalized counts were then rescaled from 0 to 1 and the average scaled score displayed on t-SNE plots generated as described in the STAR methods. The left panel shows the level of expression of DC subset signature scores. The right panel shows the mapping across tSNE space of similar scores generated from differentially expressed genes after pairwise comparisons of subsets, as indicated.

K. Unsupervised hierarchical clustering of single cell transcriptomes of BM precursor and mature DC subsets and CD14<sup>+</sup> monocytes, using all protein-coding, non-cell cycle genes (independent of surface antigen expression). Marker genes for 15 clusters generated within SC3 ( $p < 0.01$ , AUROC  $> 0.85$ ) are shown. Examples used to identify clusters are marked in red and derived from subset signature genes in Villani et al.. Clusters were used to annotate **Figure 4F, H**. The top rows display fluorescence intensity of surface antigens ('Surface Antigens') from index sorted cells. 'Flow Annotation' denotes the classification of index sorted cells by their surface phenotype (in **Figure S4I**), Cluster color code related to **Figure 4F,H**.

L. The output of *in vitro* culture of DC precursors from PB, FACS-purified using the gating strategy shown in **Figure 4C** showing lineage-specific enrichment from precursors, analogous to the output from phenotypically similar BM precursors. Output is expressed as the proportion of each DC and monocyte population as a percentage of the total cells captured by all DC and monocyte gates.  $n = 3-5$  donors for each population. Bars represent mean  $\pm$  SEM, circles represent individual experiments.

M. Proliferative potential of PB DC precursors at day 3 of culture, estimated by CFSE dilution. Bulk CD34<sup>+</sup> progenitors and CD14<sup>+</sup> monocytes were included as positive and negative controls, respectively. The CFSE dilution histograms for each precursor are grouped and ordered according to their proposed position in the developmental trajectory for pDC or DC2 lineages. Results are representative of  $n = 3$  experiments.

N. Sorting strategy applied to Lin-HLA-DR<sup>+</sup> CD1c-CD141<sup>-</sup> cells, and location, in flow cytometry parameter space, of subsequently index-sorted PB precursor cells (CD2-pDC excluded) purified for scRNA-Seq analysis depicted in **Figure S4O-R**.

O. Hierarchical clustering of single cell transcriptomes of PB pre-DC populations showing signature genes that identify 8 clusters ( $p < 0.05$  and AUROC  $> 0.7$ ), used to annotate **Figure S4P**. These defined CD11c<sup>+</sup> pre-DC2 (cluster 1 and 2; marked by *CD1c* and *SIRPA* at RNA level), AXL<sup>+</sup>CD5<sup>+</sup>-CD11c<sub>lo</sub> early pre-DC2 (clusters 4,5,6,8), CD34<sub>int</sub>CD123<sub>int</sub>AXL<sup>-</sup> cells, marked by *NFIL3* (critical for cDC1 development, Bagadia et al., 2019) and shown to have enriched cDC1 potential in culture (**Figure S4L**) and a small number of AXL-CD5-CD303/4<sub>hi</sub> pre-pDC (contained within cluster 7, marked by *SERPINF1*, *MZB1*).

P. tSNE of the first 5 principal components (26% total variance) of 116 single cell transcriptomes sampled from PB pre-DC populations, annotated by the gate of origin from index-linked flow cytometry (Index Sort) or by 7 clusters generated from hierarchical clustering **Figure S4O**. Pre-DC2 and pre-pDC were polarized in tSNE space, linked by early pre-DC2 which showed variable expression of both pDC and CD1c+DC genes.

Q. Heatmaps show expression of key TF on the tSNE plot from **Figure S4P**.

R. Mapping of single cell transcriptomes to cell populations identified by Villani et al. Cells identified as early pre-DC2 and pre-DC2(CD123<sup>+</sup>CD5<sup>+</sup>CD303/4<sub>lo</sub>) showed enrichment of gene expression with 'AS' DC (DC5) and DC2; pre-pDC (CD123<sup>+</sup>CD2<sup>+</sup>CD303/4<sub>hi</sub>) mapped to pDC (DC6) and the CD34<sub>int</sub>CD123<sub>int</sub>SIRPA<sup>-</sup> population (early pre-cDC1) showed enrichment of genes expressed by a CD34<sub>int</sub>CD100<sup>+</sup> population also found in Villani et al. to contain cDC1 potential *in vitro*.

Figure S5, related to Figure 5

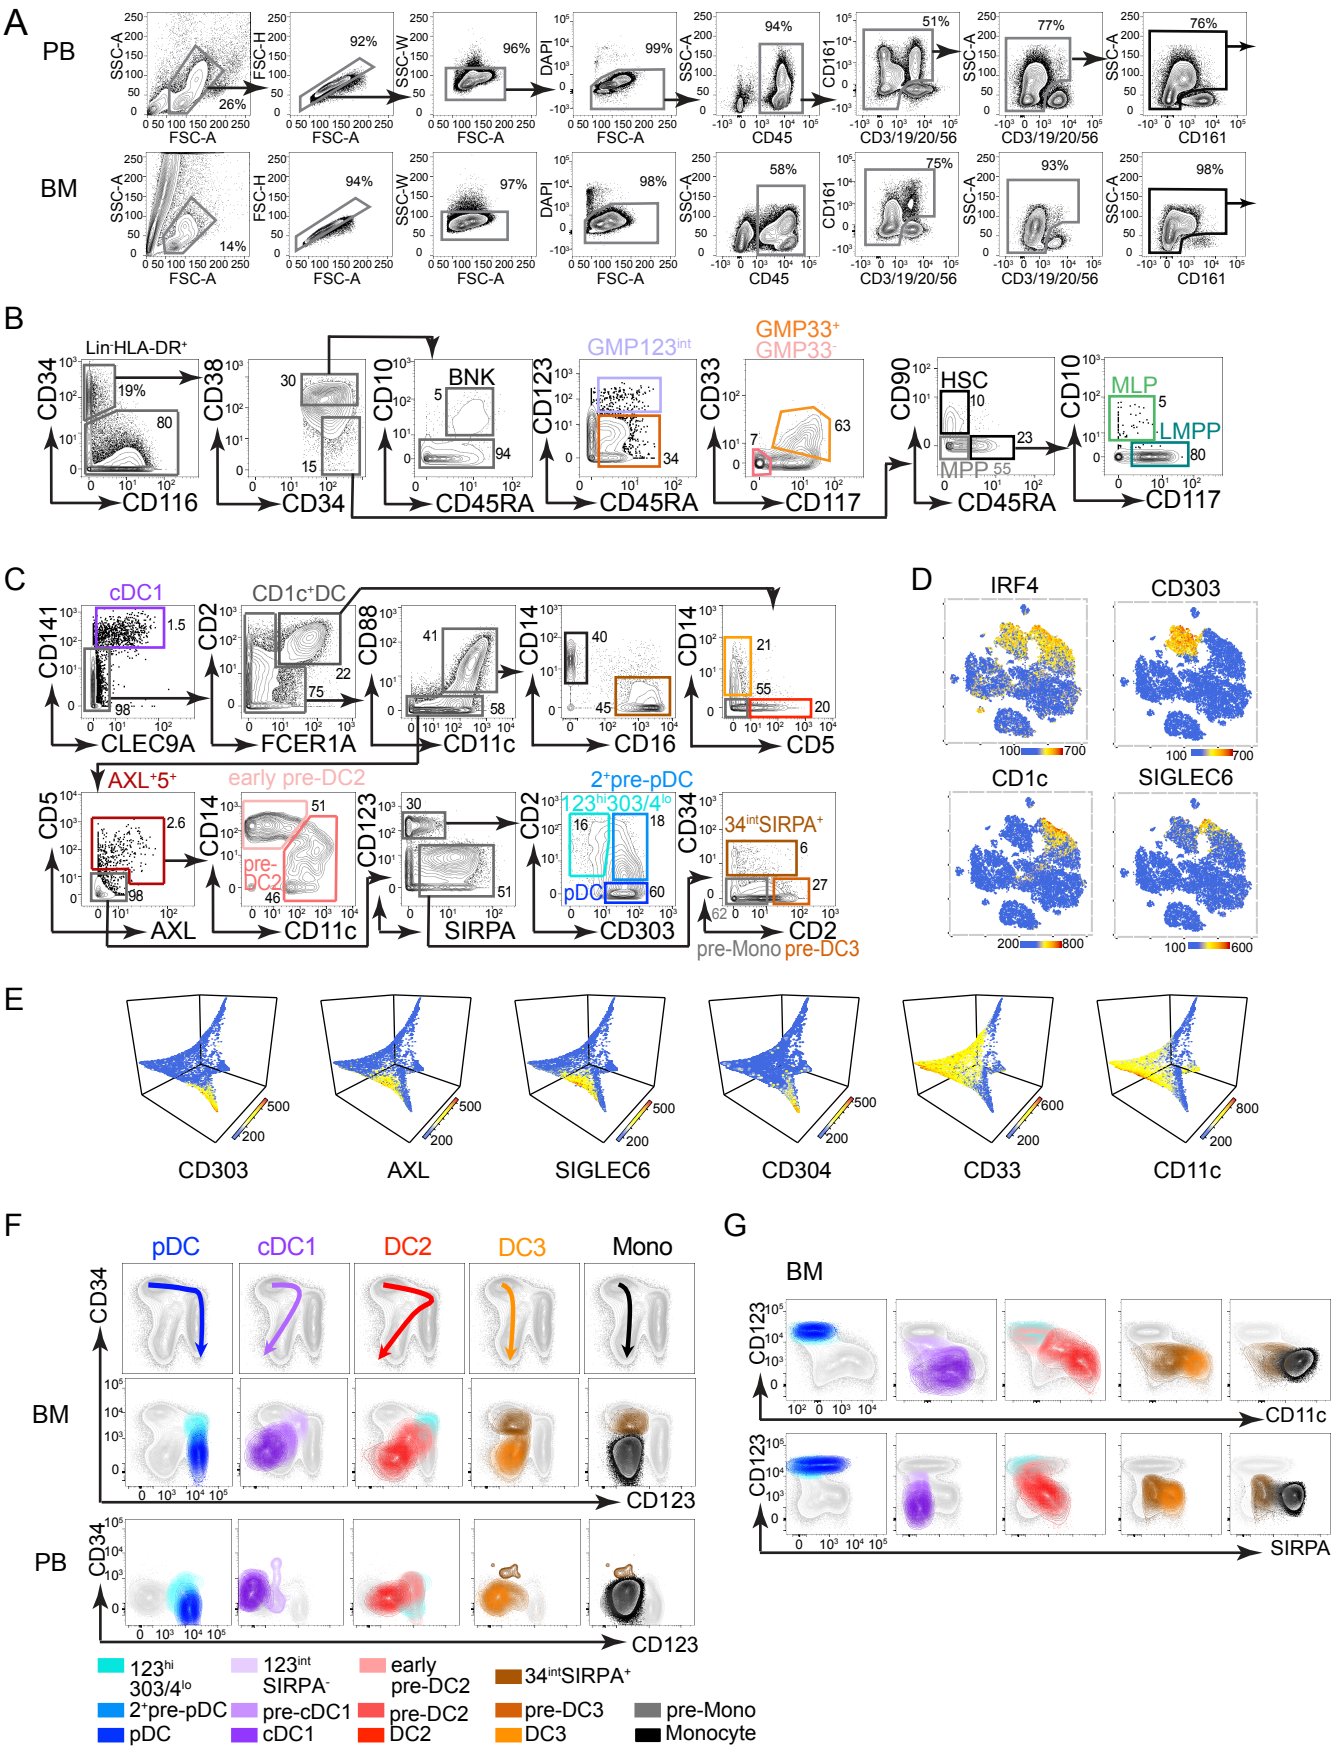

**Figure S5. Differential IRF8 expression defines the two trajectories of DC development**

A. Flow cytometric gating strategy for the FACS-purification of PBMC and BMMC to enrich for CD45<sup>+</sup> cells and exclude lin(CD3,19,20,56,161)<sup>+</sup> lymphocytes prior to CyTOF analysis (**Figure 5A-E**).

B. Gating of bivariate plots from CyTOF analysis to identify CD34<sup>+</sup> progenitor subsets, comparable with flow cytometric analysis in **Figure 3A**.

C. Gating of bivariate plots from CyTOF analysis to identify DC and monocyte subsets and their precursors, comparable with flow cytometric analysis in **Figure 4A**.

D. Heatmap expression of IRF4 and additional key antigens (CD303, CD1c, SIGLEC6) across the tSNE visualization plot shown in **Figure 5A-E**.

E. Heatmaps of the expression (log2) of additional key antigens superimposed across the diffusion map trajectories generated with 14,000 GMP, precursor and mature DC and monocyte cells and 29 markers to infer pseudo-temporal ordering of cells and reconstruct lineage branching, as shown in **Figure 5F**.

F. Back-gating of CD34<sup>neg-int</sup> DC precursors and DC subsets (defined in **Figure 4A**) on bivariate plots, to relate the DC developmental pathways to standard flow analysis. The relative expression of CD34 and CD123 is visualized across populations comprising lineage-specific developmental pathways as defined by the previous data. Schematic arrows summarize the proposed sequence of maturation of gated populations across the 2D space, from CD34<sup>+</sup> progenitor compartment to mature DC populations. The utility of BM as a source material and relative paucity of DC precursors in PB is also illustrated.

G. Lineage-specific CD34<sup>neg-int</sup> DC precursors and DC subsets from BM, as defined in **Figure 4A**, backgated onto bivariate plots of CD123 versus CD11c and CD123 versus SIRPA/B to visualize the relative expression of these antigens on populations comprising lineage-specific developmental pathways.

Figure S6, related to Figure 6

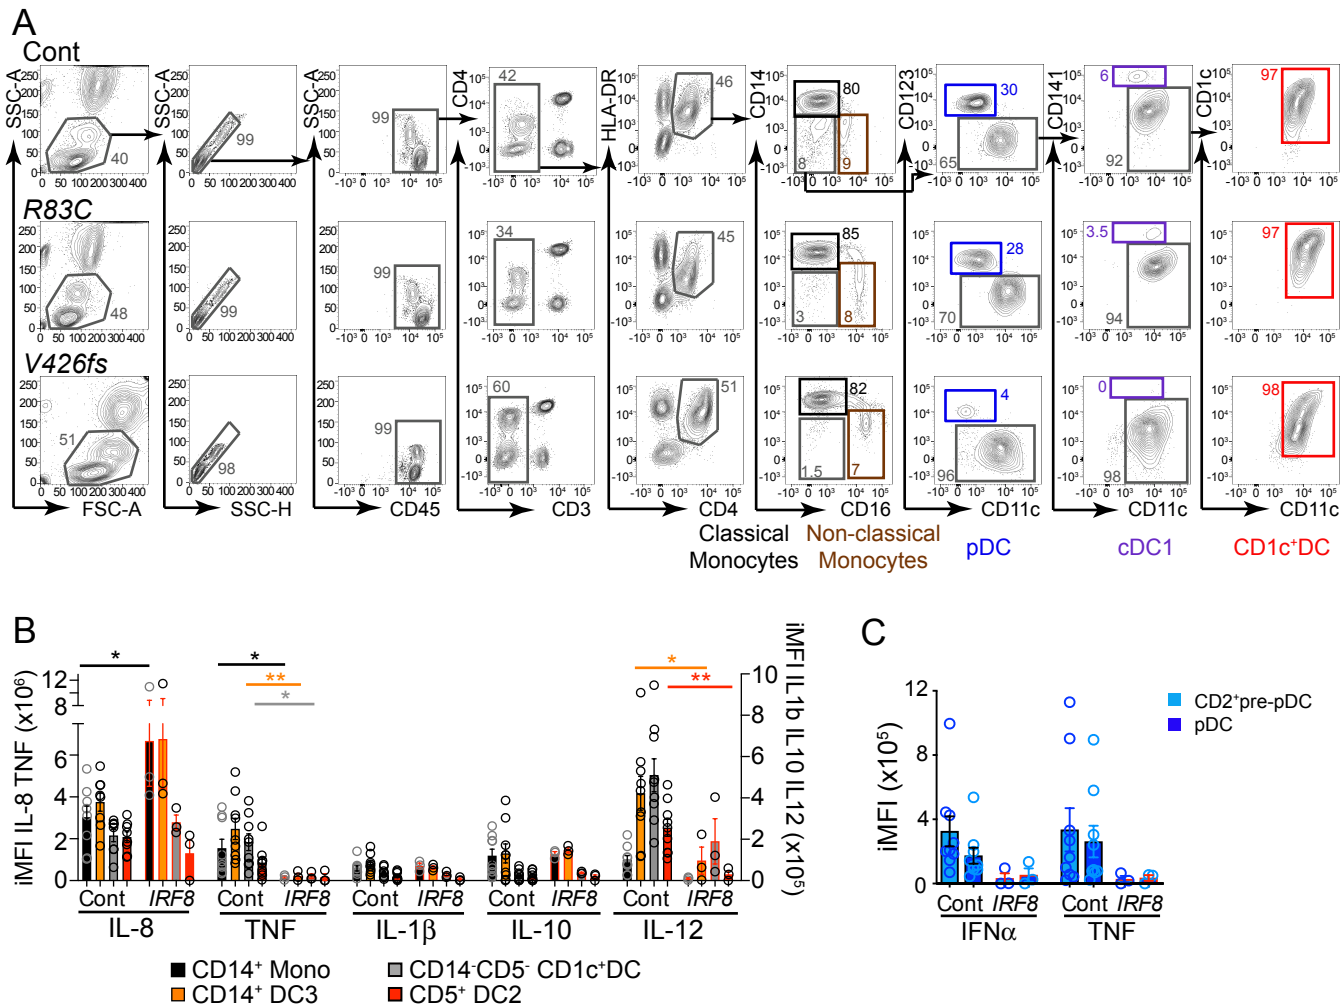

**Figure S6. IRF8<sub>hi</sub> and IRF8<sub>lo</sub> pathways are differentially compromised in IRF8 deficiency**

A. Flow cytometric gating strategy for whole PB Trucount™ analysis of a HC (Cont), subject carrying heterozygous *IRF8* mutation (*R83C*) and subject carrying dominant negative mutation (*V426fs*), summarized in **Figure 6B**. Numbers represent the percent of cells from the parent gate.

B-C. Intracellular flow cytometric analysis of *in vitro* cytokine elaboration by monocytes (black bars), CD14<sup>+</sup>DC3 (orange), CD14<sup>+</sup>CD5<sup>+</sup>CD1c<sup>+</sup>DC (gray) and CD5<sup>+</sup>DC2 (red) (B) and CD2<sup>+</sup>pre-pDC and pDC (C) from HC (n=8) and subjects carrying heterozygous *IRF8* mutations (*R83C*, *R291Q*, mean of technical duplicates; and *V426fs*) in response to 14hrs stimulation with TLR agonists (CpG, poly(I:C), CL075, LPS). Integrated median fluorescence intensity (iMFI) was calculated by multiplying the frequency of positive cells by the MFI of a given marker. Bars show mean±SEM. P values from Mann Whitney U analysis (\* p<0.05, \*\*p<0.01, \*\*\*p<0.001).

Figure S7, related to Figure 7

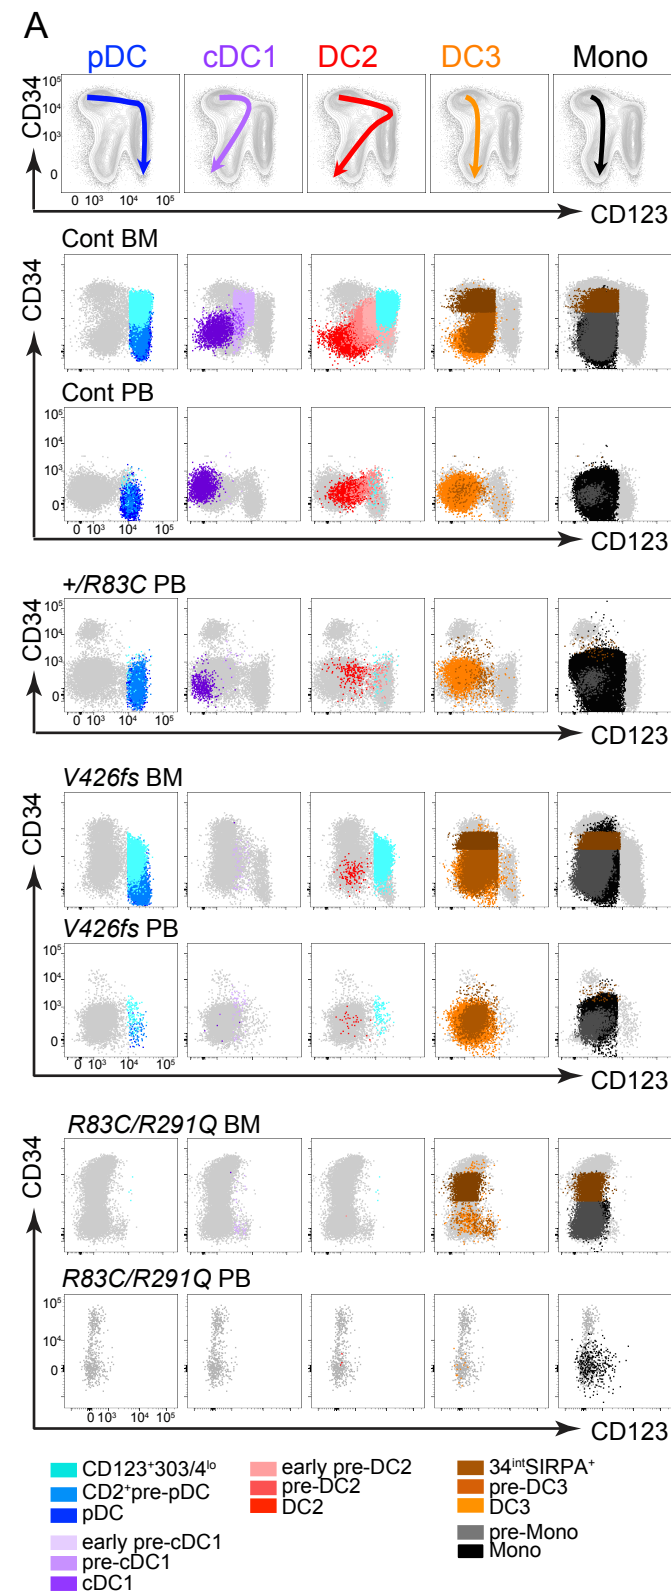

**Figure S7. IRF8 deficiency causes dose-dependent blockade of the IRF8<sup>hi</sup> pathway**

A. Summary of DC and monocyte differentiation pathways from BM (where available) and PB of subjects carrying heterozygous *R83C*, dominant negative *V426fs* and bi-allelic *R83C/R291Q* *IRF8* mutations. DC and precursor populations were gated as shown in **Figure 7B**. These were backgated on bivariate plots to visualize the relative expression of CD34 and CD123 on populations comprising lineage-specific developmental pathways. Arrows indicate the proposed sequence of maturation of gated populations from CD34<sup>+</sup> progenitor compartment to mature DC populations.
